# Supplementary material for: What is the impact of a community smart fridge? Investigating food waste, food insecurity and food interactions
Source: Research Square preprint supplement (doi:10.21203/rs.3.rs-7187885/v1), 2025-08-20
Supplement: Supplementary file 1 [file b3ec01c59cc25553907af1fc.xlsx]

## Sheet: Food In Summer
Days	Vegetables in	Fruit In	Dairy In	Grains In	Protein In	Non-perishables In
Day 1	8.8	2.7	2	1.6	2	0.9
Day 2	9.7	6.4	4.6	2.4	1	1.35
Day 3	18.75	4.9	3.2	2.4	2	1.8
Day 4	21.5	4.1	5	4	2.5	2.25
Day 5	19	6.4	3.2	3.6	1	2.25
Day 6	18.5	8.85	4	2.1	2.5	2.7
Day 7	20.1	10.2	3.8	6	2.5	3.15
Day 8	19.12	14.8	1.8	4.4	3.5	3.6
Day 9	24.97	10.25	4.9	0.8	2	4.05
Day 10	28.85	11.9	4.9	0.8	6	4.5
Day 11	34.86	15.3	6.9	0.8	5.8	4.95
Day 12	38.1	11.7	8.4	3.2	5.8	4.95
Day 13	46.75	27.8	5	3.2	3.3	5.4
Day 14	24.6	13.04	5.4	2	6.8	5.85
Day 15	52.8	22.99	4	2	4.5	6.3
Day 16	41	36.09	4	2	4.5	6.75
	26.7125	12.9638	4.44375	2.58125	3.48125	3.79688

## Sheet: Food In Winter
Days	Vegetables in	Fruit In	Dairy In	Grains In	Protein In	Non-perishables In
Day 17	7.5	3.36	2	5.2	2	0
Day 18	14.1	4.94	1.2	8	3.5	0
Day 19	9	4.6	3.2	6.4	3	0
Day 20	18.65	8.1	3.3	5.2	2.3	2
Day 21	26.4	4.95	5.4	8	6.5	0
Day 22	13.1	6.9	5.2	2.1	4.5	1
Day 23	19	5.3	6.3	16	4.9	0
Day 24	11.72	8.3	3	11.4	3	0
Day 25	14.1	3.7	8.9	12.8	3.2	0
Day 26	18.65	7.8	2.2	11.8	5.5	0
Day 27	23.7	7	2.5	7.8	6.05	0
Day 28	15.85	5.35	2	7	7.5	0
Day 29	27.4	6.7	3.5	9.9	8.8	0
Day 30	34.4	9.6	8.2	11.5	10.2	6.8
	18.1121	6.18571	4.06429	8.79286	5.06786	0.7

## Sheet: Food Types by Volume
Specific Food Donations	Summer Volume	Summer Weight (kg)	Specific Food Donations2	Winter Volume	Winter Weight (kg)
Vegetables
Lettuce	130 heads	78	Lettuce	79 heads	47.4
Carrots	165 pieces	16.5	Carrots	169 pieces	16.9
Broccoli	115 pieces	46	Broccoli	41 pieces	20.4
Green Beans	assorted	26.4	Green Beans	assorted	18
Broad Beans	assorted	.5	Sour Cabbage	48 packs	24
Mung beans	50 packs	10	Mung beans	25 packs	5
Coriander	12 packs and 6 plants	2.5	Coriander	5 packs	1
Artichokes	74 7 pieces	14.8	Artichokes	7 pieces	1.4
Mixed Salad	122 packs	42.7	Mixed Salad	128 packs	44.8
Onions	assorted	7.5	Onions	assorted	.4
Fennel	152 pieces	60.8	Fennel	13 pieces	5.2
Potatoes	assorted	1	Potatoes	assorted	.5
Garlic	assorted	.2	Sweet Potatoes	assorted	10.5
Rainbow Chard	assorted	12	Rainbow Chard	assorted	.4
Aubergine	109 pieces	21.8	Aubergine	54 pieces	10.8
Turnips	28 pieces	5.6	Turnips	42 pieces	4.2
Celery	16 pieces	6.4	Celery	assorted	1
Radishes	assorted	1.4	Radishes	assorted	.7
Mushrooms	3 boxes	.6	Mushrooms	9 boxes	1.8
Beetroot	28 pieces	5.6	Beetroot	15 pieces	3
Ginger	6 pieces	.06	Spinach	assorted	12
Tomatoes	7 packs	2.1	Tomatoes	27 packs	10.8
			Mixed Sprouts	3 packs	.3
			Cauliflower	4 pieces	2.4
			Kale	1 pack	1
			Paprika	6 pieces	.9
			Cucumbers	32 pieces	9.6
Fruit
Bananas	97 pieces	19.4	Bananas	93 pieces	18.6
Oranges	91 pieces	22.75	Oranges	99 pieces	24.75
Apples	180 pieces	36	Apples	96 pieces	19.2
Strawberries	assorted	1.5	Strawberries	7 boxes	1.4
Kiwis	48 pieces	4.8	Kiwis	16 pieces	1.6
Figs	6 boxes	.3	Figs	4 boxes	.2
Blueberries	assorted	3.8	Blueberries	assorted	2.2
Mangoes	24 pieces	6	Blackberries	assorted	4
Grapes	6 packs	3	Passion Fruit	16 pieces	.4
Melons	16 pieces	32	Melons	1 piece	2
Peaches	118 pieces	17.7	Peaches	26 pieces	3.9
Pears	20 pieces	3	Pears	25 pieces	3.75
Lemons	60 pieces	7.2	Lemons	38 pieces	4.56
Limes	86 pieces	10.32	Limes	22 pieces	2.64
Passion Fruit	48 pieces	2.4
Pineapple	8 pieces	16
Dairy
Milk	49 bottles	49	Milk	19 bottlea	19
Yoghurt	57 tubs	17.1	Yoghurt	85 tubs	25.5
Strachiatella	10 tubs	5	Strachiatella	10 tubs	5
			Cheese	19 pieces	7.6
			Kefir	3 tubs	1.5
Grains
Bread	80 loaves	36	Bread	172 loaves	68.8
Muesli	16 boxes	1	Muesli	18 boxes	18
			Small Pastries	145	36.25
Protein
Beef	12 packs	6	Beef	23 packs	11.5
Pork	16 packs of sausages	8	Pork	52 sausages	15.6
Chicken	18 packs	9	Chicken	7 packs	3.5
Fish	12 packs	3	Fish	10	4
Vegan Mince	55 packs	22.5	Vegan Mince	26 packs	13
			Tofu	13 packs	6.5
			Tempeh	31 packs	10.85
			Soya	6 packs	2.1
			Ready Meals	4 packs	2.2
Non perishables
Chocolate	875 bars of dark choc and sea salt	78.75	Prosecco	4 bottles	4
			Coffee	4 bags	2
			Jam	4 jars	2

## Sheet: Food Averages with kgCO2e
Days	Vegetables in	Fruit In	Dairy In	Cereals In	Protein In	Miscellaneous In	Total In
Day 1	8.8	2.7	2	1.6	2	0.9	18
Day 2	9.7	6.4	4.6	2.4	1	1.35	25.45
Day 3	18.75	4.9	3.2	2.4	2	1.8	33.05
Day 4	21.5	4.1	5	4	2.5	2.25	39.35
Day 5	19	6.4	3.2	3.6	1	2.25	35.45
Day 6	18.5	8.85	4	2.1	2.5	2.7	38.65
Day 7	20.1	10.2	3.8	6	2.5	3.15	45.75
Day 8	19.12	14.8	1.8	4.4	3.5	3.6	47.22
Day 9	24.97	10.25	4.9	0.8	2	4.05	46.97
Day 10	28.85	11.9	4.9	0.8	6	4.5	56.95
Day 11	34.86	15.3	6.9	0.8	5.8	4.95	68.61
Day 12	38.1	11.7	8.4	3.2	5.8	4.95	72.15
Day 13	46.75	27.8	5	3.2	3.3	5.4	91.45
Day 14	24.6	13.04	5.4	2	6.8	5.85	57.69
Day 15	52.8	22.99	4	2	4.5	6.3	92.59
Day 16	41	36.09	4	2	4.5	6.75	94.34
Day 17	7.5	3.36	2	5.2	2	0	20.06
Day 18	14.1	4.94	1.2	8	3.5	0	31.74
Day 19	9	4.6	3.2	6.4	3	0	26.2
Day 20	18.65	8.1	3.3	5.2	2.3	2	39.55
Day 21	26.4	4.95	5.4	8	6.5	0	51.25
Day 22	13.1	6.9	5.2	2.1	4.5	1	32.8
Day 23	19	5.3	6.3	16	4.9	0	51.5
Day 24	11.72	8.3	3	11.4	3	0	37.42
Day 25	14.1	3.7	8.9	12.8	3.2	0	42.7
Day 26	18.65	7.8	2.2	11.8	5.5	0	45.95
Day 27	23.7	7	2.5	7.8	6.05	0	47.05
Day 28	15.85	5.35	2	7	7.5	0	37.7
Day 29	27.4	6.7	3.5	9.9	8.8	0	56.3
Day 30	34.4	9.6	8.2	11.5	10.2	6.8	80.7
	22.699	9.80067	4.26667	5.48	4.22167	2.35167	48.8197
Total	680.97	294.02	128	164.4	126.65	70.55	1464.59
https://ourworldindata.org/grapher/food-emissions-supply-chain?country=Beef+%28beef+herd%29~Cheese~Poultry+Meat~Milk~Peas~Bananas~Fish+%28farmed%29~Tofu~Dark+Chocolate~Tomatoes~Apples~Barley~Berries+%26+Grapes~Citrus+Fruit~Maize~Onions+%26+Leeks~Other+Fruit~Other+Pulses~Other+Vegetables~Potatoes~Root+Vegetables~Wheat+%26+Rye	.833	.90	13.6	1.5	31.53	47	15.89
	566.34kgCO2e	264.62	1740.8	246.6	3993.27	3315.85	10127.48

## Sheet: FIES Theta Scores and Spending
FIESRaschScoreandSpending
fies_category	theta	monthly_spending
Food Secure	-3.961792504	250.0
Mild Food Insecurity	-0.75366756	300.0
Severe Food Insecurity	2.165363974	200.0
Food Secure	-1.987608983	250.0
Food Secure	-6.119833429	500.0
Food Secure	-3.961792504	600.0
Food Secure	-1.987608983	620.0
Moderate Food Insecurity	0.255527625	500.0
Food Secure	-6.119833429	800.0
Food Secure	-1.987608983	550.0
Food Secure	-1.987608983	450.0
Moderate Food Insecurity	0.255527625	100.0
Food Secure	-6.119833429	750.0
Mild Food Insecurity	-0.75366756	500.0
Severe Food Insecurity	3.572412801
Moderate Food Insecurity	0.255527625	575.0
Food Secure	-6.119833429	500.0
Food Secure	-3.961792504	300.0
Food Secure	-3.961792504
Food Secure	-6.119833429	700.0
Food Secure	-3.961792504	400.0
Moderate Food Insecurity	1.172031558	200.0
Food Secure	-1.987608983	400.0
Food Secure	-3.961792504	350.0
Food Secure	-6.119833429	800.0
Mild Food Insecurity	-0.75366756	250.0
Food Secure	-6.119833429	900.0
Food Secure	-1.987608983	475.0
Food Secure	-3.961792504	500.0
Severe Food Insecurity	2.165363974	200.0
Food Secure	-1.987608983	800.0
Food Secure	-6.119833429	500.0
Moderate Food Insecurity	0.255527625
Food Secure	-1.987608983	500.0
Food Secure	-6.119833429	650.0
Food Secure	-3.961792504	650.0
Moderate Food Insecurity	0.255527625	350.0
Food Secure	-3.961792504	450.0
Food Secure	-6.119833429	900.0
Food Secure	-3.961792504	350.0
Mild Food Insecurity	-0.75366756	425.0
Food Secure	-6.119833429	600.0
Food Secure	-6.119833429	200.0
Moderate Food Insecurity	1.172031558	150.0
Food Secure	-6.119833429	800.0
Food Secure	-1.987608983	500.0
Food Secure	-3.961792504	500.0
Food Secure	-1.987608983	250.0
Mild Food Insecurity	-0.75366756	150.0
Food Secure	-6.119833429	425.0
Mild Food Insecurity	-0.75366756	350.0
Food Secure	-6.119833429	280.0
Severe Food Insecurity	5.083221512	50.0
Food Secure	-1.987608983	450.0
Moderate Food Insecurity	0.255527625	275.0
Food Secure	-3.961792504	1000.0
Food Secure	-3.961792504	350.0
Mild Food Insecurity	-0.75366756	300.0
Food Secure	-3.961792504	475.0
Mild Food Insecurity	-0.75366756	325.0
Food Secure	-3.961792504	650.0
Severe Food Insecurity	3.572412801	400.0
Moderate Food Insecurity	0.255527625	200.0
Food Secure	-1.987608983	300.0
Food Secure	-3.961792504	600.0
Mild Food Insecurity	-0.75366756	200.0
Severe Food Insecurity	3.572412801	0.0
Moderate Food Insecurity	0.255527625	500.0
Food Secure	-1.987608983	600.0
Food Secure	-1.987608983	500.0
Mild Food Insecurity	-0.75366756	550.0
Moderate Food Insecurity	0.255527625
Moderate Food Insecurity	0.255527625	400.0
Food Secure	-3.961792504	800.0
Food Secure	-3.961792504	200.0
Mild Food Insecurity	-0.75366756	600.0
Food Secure	-3.961792504	700.0
Food Secure	-1.987608983	800.0
Mild Food Insecurity	-0.75366756
Food Secure	-3.961792504	250.0
Mild Food Insecurity	-0.75366756	300.0
Food Secure	-1.987608983	600.0
Severe Food Insecurity	5.083221512	100.0
Food Secure	-1.987608983	600.0
Food Secure	-1.987608983	500.0
Food Secure	-1.987608983	250.0
Food Secure	-3.961792504	500.0
Food Secure	-3.961792504
Food Secure	-1.987608983	700.0
Mild Food Insecurity	-0.75366756	500.0
Food Secure	-6.119833429	800.0
Moderate Food Insecurity	0.255527625
Food Secure	-1.987608983	200.0
Food Secure	-3.961792504	350.0
Food Secure	-1.987608983	850.0
Food Secure	-6.119833429	650.0
Food Secure	-1.987608983	250.0
Food Secure	-1.987608983	800.0
Food Secure	-6.119833429
Mild Food Insecurity	-0.75366756	800.0

## Sheet: Qualitative Responses on Survey
How does this community fridge help meet your own food needs? Hoe helpt deze koelkast in uw eigen voedselbehoefte te voorzien?	Any extra comments? Nog andere opmerkingen?
Gratis eten is leuk voor alles	no
It is good to re-use food and provide new meals
It gives ingredients I cannot usually afford from the market	Leuk initiative
It is good to think on which foods are perishable but also shareable
It provides new vegetables I would not normally purchase
I didn't take anything this time but will keep looking next time i pass	Really cool 😎
It is good to reduce waste but i want to put food in it also
It makes me feel welcomed
It is a nice initiative but niet voor mij	Keep it up
alle kleine hulp	het zou leuk zijn om meer fruit te hebben
het voelt fijn om met anderen te delen	Er zou een vriezer aan kunnen zitten
I can not afford food from the market	Who can i thank?
Dat is niet het geval
Ik wil afval verminderen	het zou handig zijn om in de koelkast te kijken
The chocoloate was a fun surprise	I wish it was bigger
It is very handy to pass by on my way home	It would be great if this was in my neighbours building as they could use it more
I did not participate but i will tell my friends who could use it	Good luck
It has made me thing more creatively about the food i have left over in my own fridge.	You should keep the food in bags to take out on the go
Ik weet niet of ik eten mag meenemen	er is een betere etikettering nodig
I am not in need but i support the community. I would like to volunteer to help with donations	You could have an advertising board or someone sat next to it with a sign to attract more people
ik kom langs	het is goed om te zien dat iedereen het gebruikt, ook daklozen
it is good to receive snacks before the work day starts	It would be helpful to know the schedule of the fridge and in evening
de melk is goed voor mijn oude botten	er zou een donatiebox kunnen zijn
I am good with managing my grocery bill but it is nice to find so many healthy foods here that are exotic and expensive too	It is not clear how fresh the food is
het leert kinderen over het delen van voedsel. We hebben wat appels meegenomen voor onze buurman
I am disabled and cannot walk far to the grocery store so this is closer to my route	It is fun to check inside because you don't know what to expect and then you see there is so much fruit and vegetables
Ik wil graag voedsel doneren, maar weet niet hoe
It gave me an artichoke, 2 bags of salad and berries to take home to the wife. We cooked together with them	Thank you
I can make ends meet but it was a nice surprise on the way to albert heijn when i did not have to go into buy extra salad items	Is it for everyone or only hungry people?
Ik betaal alleen kant en klaarmaaltijden	Ik nam maar 4 stuks fruit en een pak vlees
Ik neem er een paar, maar moet veel voor anderen achterlaten	Het is een socialistische revolutie!
I can make great soups with the ingredients	It could have clear bags for the leftover lettuces
de gemeenschap kijkt naar ons uit	verwijder alle tekenen
het is inspirerend om te zien hoe anderen voedselverspilling bestrijden	Ik wil het meenemen, maar weet niet of iemand anders het meer nodig heeft
I take a bag of salad for myself, lots of chocolate and fruits for the neighbours and leave the rest for others in need	Can we donate food or is it just leftovers?
It is only a little but it helps alot	You could package the food better so it looks organised
Ik maak smoothies met het gratis eten	het zou leuk zijn om meer bessen te hebben
Ik begrijp niet wie dit heeft voorbereid. Maar ik ben dankbaar
it doesn't help financially but from a food waste point of view it is good to stop emissions like methane from reaching landfill sites	The fridge could have alerts for nearby residents when it gets filled up
It is better to give than receive and it would be nice to give something to donate too	You could have a QR code like Albert Heijn with Voedselbank to register and donate a product
Ik kan niet voor mezelf koken. Het is moeilijk om ingrediënten te vinden	Als u bezorgt, zou ik het graag ontvangen
het geeft inspiratie	weet je zeker dat het fris is buiten in de zon
het is nuttig om te eten en voedsel mee te nemen terwijl je door de straten loopt. Ik heb soms honger in de ochtend, omdat er nergens een gratis ontbijt is
Ik kan niet koken zonder huis, maar de chocolade en het verse fruit worden zeer gewaardeerd	Ik kan niet koken zonder huis, maar de chocolade en het verse fruit worden zeer gewaardeerd
I don't know if this food is for charity or for everyone	But i still like the concept. It reminds me of the old book shelves
Ik heb er maar een paar genomen, maar heb veel achtergelaten voor de volgende persoon
het heeft een sociale functie	het kan groter en beter geadverteerd
It is good to help with food costs but also with an ecology goal	Some of the wrapping is too much. Not each ingredient needs its own bag
I get money from the government and goto voedselnanks but this is convenient. It would be useful to have a map of many fridges in the city and on the outside where there is more poor homes	It could become an art project or something
Ik wil graag meer vlees	Minder ruimte voor oude groente en meer ruimte voor eiwit
The items can help with soups and salads, or for full meals. I cannot afford artichokes, fancy chocolate and passion fruits.	It would be nice to donate food to others too. Or collect to give to my friends if possible?
Ik verzamel voedsel voor mijn buren die het nodig hebben, maar ook voor anderen willen vertrekken
I am homeless and looking for work. The food is not all edible but that is okay I am thankful for what i can get	Bless you
It is good to help the environment and eat healthier too	This is a good invention. Or a new spin on an old invention. It reminds me of the fridge from Wallace and Gromit with wheels
Ik kan de portiegroottes verkleinen om aan anderen te geven	het is een speels ontwerp
It is a good reminder to eat all your vegetables but look after your fellow humans	it wold be nice to see it grow food on the top too
het geeft voedzaam voedsel om mij gezond te houden
It has dairy and meat which is not always cheap. The fish was very tasty	It could be bigger and with more social media channels
Ik kan het supermarktvoedsel niet altijd betalen, dus dit voedt ook de ziel
Ik had niet zoveel chocolade verwacht. Dat is genieten bij mij thuis	ik vind de tekening leuk
I am not needy but took some potatoes and sausages. It is for me an important issue to feed the community and not waste food. It is so easy to do it but this fridge serves as a helpful reminder	It is a worthy cause
Money is strict with rising food prices. There are items i can no longer buy like fish, especially salmon. So this was something i cherished from the mini fridge	It could have the temperature showing on the side so people know it is safe
It has given me energy when i need throughout the day. It is not enogh on its own to solve hunger in he area but it is a good beacon to start. if each apartment complex had their own shared refridgerator then more people would be looked after, The government could do a delivery service for my neighbours who could use the help of a warm meal.	It is not enough on its own but needs scale to solve the food price disaster
Ik ben streng in mijn uitgaven en betaal niet langer om uit eten te gaan. Ik maak hier gebruik van de gemeenschapsmaaltijden, wat ook goed is voor mijn sociale vaardigheden. De koelkast vervult die functie niet, maar heeft een eigen speciale plek om voedselverspillingsproblemen op te lossen.
I like to cook for other people in the community that cannot cook for themselves due to old age and other health ailments. This fridge could be used for these volunteer services. There is a big market for found and saved foods.	If you could get a supply of ready meals and sandwiches that would help the homesless too. Lots of the vegetables in here are for people with cooking abilities only.
Ik heb niet altijd genoeg geld om te eten, maar mijn eetlust is laag en het is prima om te leven. Maar de koelkast herinnert me eraan om ook de kleine dingen te eten. Het fruit dat hier wordt tentoongesteld is exotisch en niet mijn normale aankoop
Ik heb geen inkomen voor eten. Ik krijg toeslag maar het is te veel voor de voedselbank. Ik zou hier graag willen samenwerken om voedsel voor anderen te leveren en mee naar huis te nemen
Zelfs in jumbo is het duur. Dus alle kleine dingen helpen de schaal van gerechtigheid in evenwicht te brengen	het zou ook toegestaan ​​moeten zijn om zoveel te nemen als je wilt, voor andere mensen in nood. Laat me weten of ik dit kan doen
het is voor mij een milieuvoordeel om methaan te verminderen	dit zou goed kunnen zijn om aan te geven hoeveel methaan je bespaart, maar ik vraag me af of het voedsel hiervoor te vers is
It is small but a start to eliminate any waste and emissions that the bigger supermarkets produce. But it is not on communities to remove pollution from the mega corporations, they should be doing enough already	It is quite low for me to bend down and i didnt see all the cholcoate at the back from standing
Ik breng meestal meer door in een sociale omgeving met anderen. Maar als ik thuis ben, geef ik minder uit, dus dit is een duurzame oplossing voor thuiseten	de versheid en voedingswaarde van voedsel kunnen worden benadrukt met maaltijdsuggesties. De ingrediënten zijn goed, maar willekeurig
My rent is most important to pay so i can get away with skipping meals every once in a while. The community fridge helps	It would be nice to put a face to the fridge so i know who to thank and get to know
I can feed myself without any big worries. But the fridge has shown me their is many good volunteers out there willing to help. It makes me feel less lonely and like their is a safety net
i sometimes volunteer with other locations but have never seen this out on the main street before. It is such a cool idea <(pun intended)	How can we donate food too?
I can source cheap food myself with lots of student discounts and deals. Our building does weekly mass meals which helps. But i am curious about how much of the food that gets donated would reduce any carbon emissions. Or where the food comes from that gets wasted. I don't think the farmers would be happy to know their produce gets wasted
Het eten is voedzaam, maar ik kan geen suiker en gluten eten, dus alleen het fruit en de groenten zijn eetbaar
It is not really affordable to eat healthy and cook for multiple people. Unless you have time to meal prep every weekend. The fridge gives ingredients i could not always afford. But other than that it just feels nice to be part of a new community
het is gezellig en inclusief
the fridge is a socially sensible idea. That it seems all the public buildings should have them in schools for children too	If the food was fresh with to go meals that would be even better to save money from cooking
I am not here frequently enough but i imagine it would save me alot of money added up each day	I would like to know hoe to setup one in my own area (niew west)
Ik neem het groene voedsel mee voor mijn gezin, dat het niet kan betalen van hun pensioen	Hoeveel kan ik verdragen?
het helpt om vitamines in te slaan	niet
Ik heb een uitkering, maar dat geldt niet voor het gezonde voedsel. Ik kan niet geloven dat iemand dit gratis weggeeft omdat het zo duur is	Dank je wel Buurtbuik
I only scored yes for 2 and 3. It is hard to find good deals for healthy food. i try to use toogoodtogo but it is mostly bread. Sometime i eat the same pasta and rice dishes because they last along time with beans and tuna for protein sources.
de koelkast is een middel om een ​​doel te bereiken, maar lost voor velen het hongerprobleem niet op. Ze hebben de productiemiddelen zelf nodig
I am lost for words by the simplicity of this idea. I hope it is safe to use but wanted to know if it can be wheeled around for different families on my street (marnixstraat)
It is not for me but others to take away. I took 4 loafs of bread, apples, pears and a big bag of carrots. It is all i could carry but will be back again to get more	I would like to become a volunteer and have emailed already. I hope to help out in the coming weeks
ik kan niet thuis koken vanwege de benzineprijzen en gezondheidsproblemen. Het is handig om te weten dat iemand dit dagelijks in voorraad heeft, omdat ik geen oud voedsel kan eten	Als er een aanmelding is om een ​​pakket in ontvangst te nemen, kan ik op weekdagen langskomen om het op te halen.
i'M NOT SURE i'M THE TARGET DEMOGRAPHIC FOR THIS BUT I WANTED TO LEAVE A MESSAGE OF GRATITUDE. I HAVE TOLD MY FRIENDS WHO CAN STRUGGLE AND THEY WILL BRING BAGS	eet smaakelijk
It is not me in need but i can imagine it helps alot of people. I don't know how to manage the amount of food that is taken but saw some people take little things and leave lots for others. So i hope it is being used fairly for those in need	You could include recipe suggestions on the QR code
I spend a lot on food because i have to watch my intake or i get ill too easily. The fridge is like a medicine cabinet though with lots of healthy treats	It would be helpful to have drinks or vitamin water on days like today in the heat
gratis eten is zeldzaam, maar het beste	een compliment met een gemeenschappelijke oven die warme maaltijden bereidt
soms ben ik voor eten afhankelijk van mijn buren of kleinkinderen. Het is niet eenvoudig om alleen te koken	Ik bewaar het eten voor als mijn oma-kinderen morgen op bezoek komen
You can always pay for food but not always healthy food. He is a help
I can afford my own meals but have taken some chocolate as i saw more than 50 in there. I posted on social media but cannot find any account for this. Let the people know as we can spread the word
Ik kan het eten niet voor mezelf meenemen, maar wil graag doorgaan met het meenemen van voedsel voor mijn gebouw
It is fortunate to find this as i was going to the claverhouse for assistance anyways	How much can i take if i take for other residents too?
It is good to not waste and let out needless emissions from food gone bad. If the fridge is for the environment too then i am happy to eat it	How is this being financed and can the grocery stores make a good business model from it
Inflation is not in line with wages. Some of the cheaper family run stores near me in west are now out of business because they cannot compete with the larger monoliths that can afford to waste food too. This fridge is a nice community strategy that democratised free food and gives power back to the people,.	I have friends who would be happy to help and have left contact details too :)
The fridge is not enough to feed us on its own. But i can cook all sorts of new meals with the ingredients found here. It all feels fresh too and i don't have to wait for any to ripen. The Tonys chocolate has some odd flavours which my son likes.	It is nice to see that someone is looking out for you. But I would like to know who if there is any gatherings for the fridge I would like to sign up
